# Supplementary material
Source: PubMed Central journal article supplement (PMC2351955)
Supplement: NIHMS40882-supplement-01.pdf [file NIHMS40882-supplement-01.pdf]

Supplemental Data

Rearrangement of Mouse Immunoglobulin Kappa  
 Deleting Element Recombining Sequence Promotes  
 Immune Tolerance and Lambda B Cell Production

José Luis Vela, Djemel Aït-Azzouzene, Bao Hoa Duong, Takayuki Ota, David Nemazee

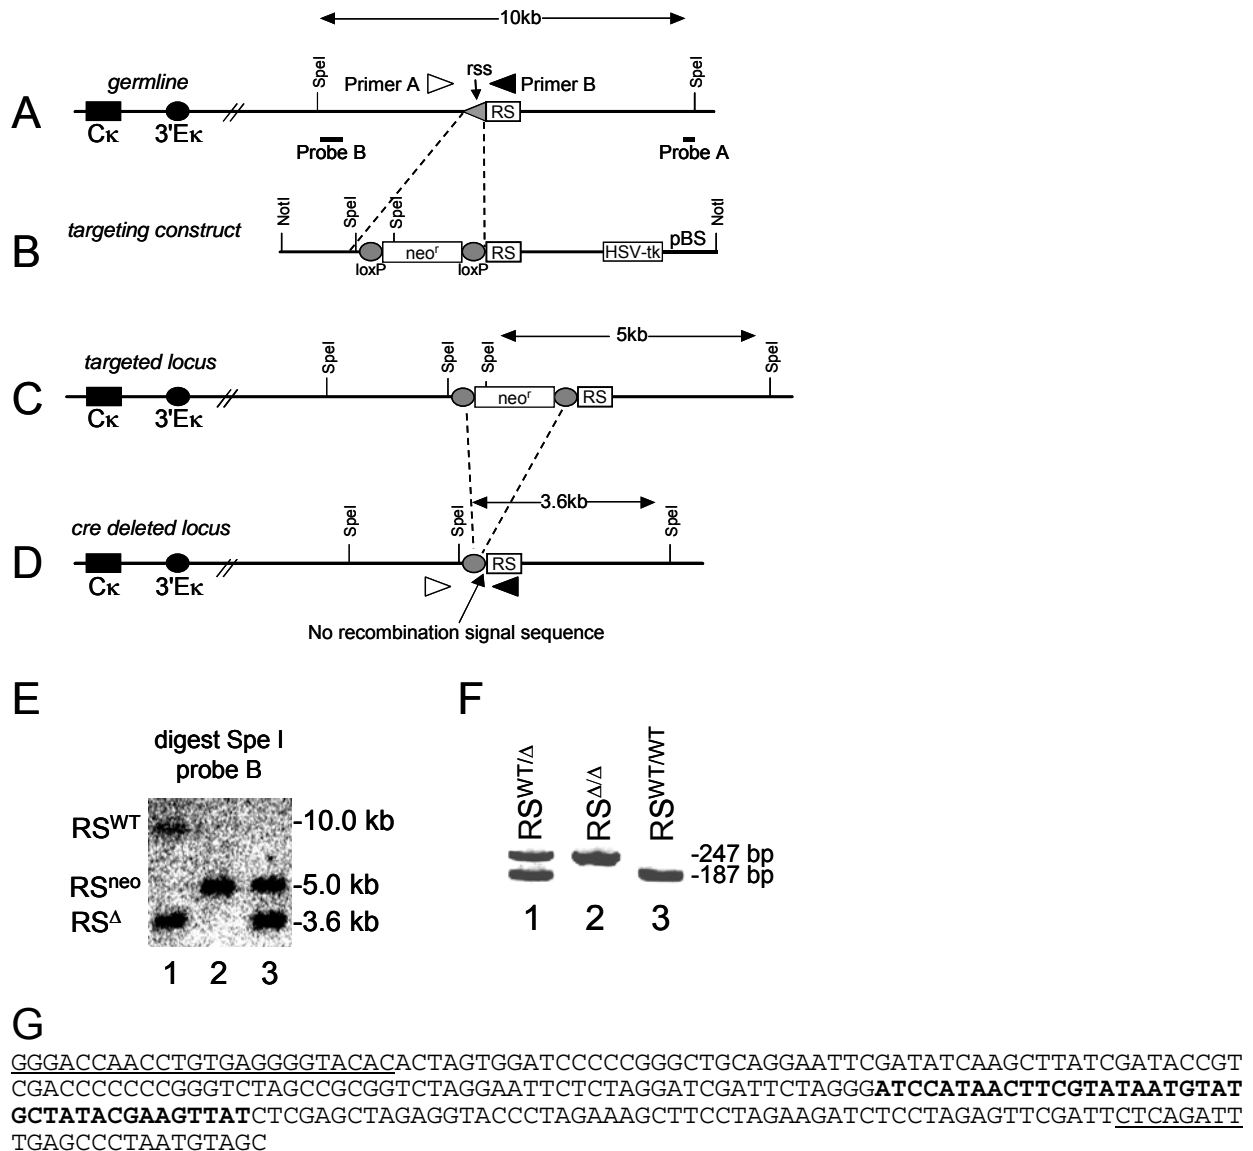

**Figure S1. Targeted Mutation of RS Recombination Signal**

(A) Germline *Igk* locus showing relative positions of RS, its recombination signal sequence (rss) and other features of the *Igk* locus, including positions of oligonucleotide primers for PCR detection of modified and germline RS locus (primers A, B), Southern blotting probes A and B, and SpeI restriction sites.

## Immunity, Volume 28

(B) Schematic of targeting construct, including loxP sites, neomycin resistance gene ( $neo^r$ ), herpes simplex virus thymidine kinase gene (*HSV-tk*) and residual bacterial plasmid backbone (pBS).

(C and D) Predicted structure of targeted RS locus before and after cre-mediated deletion of  $neo^r$  insertion.

(E) Southern blot analysis of *SpeI*-digested mouse tail DNA. Lanes 1, 3: (RS targeted x *ZP3-cre Tg*)F2. Lane 1: mouse received wild type allele from its father. Lane 2: homozygous targeted (but not  $neo$  deleted)  $RS^{neo/neo}$  mouse. Lane 3: mouse received targeted alleles from both parents, but only the maternal allele underwent cre deletion ( $RS^\Delta$ ).

(F) PCR analysis of tail DNA using primers A and B, which are indicated in part A.

(G) RS mutated sequence after cre/loxP recombination ( $RS^\Delta$ ), as determined by cloning and sequencing PCR product generated as in F (lane 2). Primer sites used are underlined, loxP site is in bold.

# A

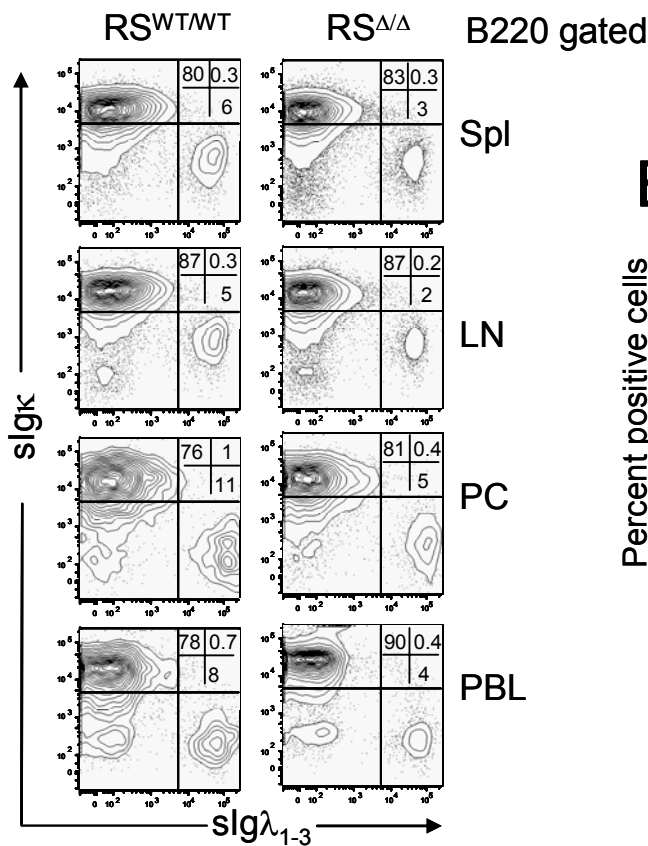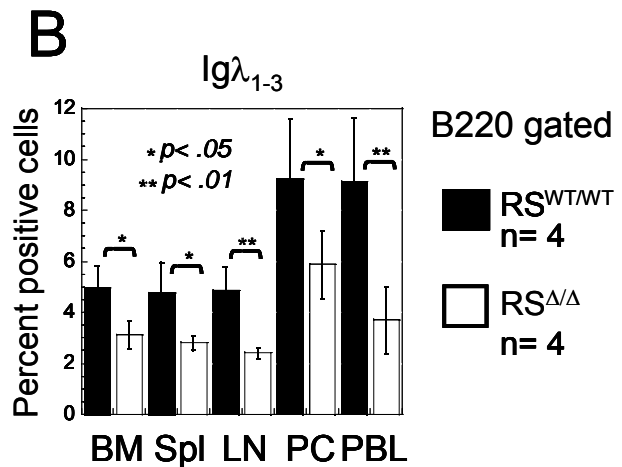

## Figure S2. Reduced Frequency of $\lambda_{1-3}^+$ Cells in Various Lymphoid Tissues of $RS^{\Delta/\Delta}$ Mice Compared to $RS^{WT/WT}$ Controls

(A) Example of flow cytometry analysis of lymphocyte cell preparations from spleen (Spl), lymph nodes (LN), peritoneal cavity (PC) and blood (PBL).

(B) Statistical analysis of data obtained from 4 mice/group. Shown are means with error bars indicating standard deviations from the mean. Methods were as indicated in Experimental Procedures.

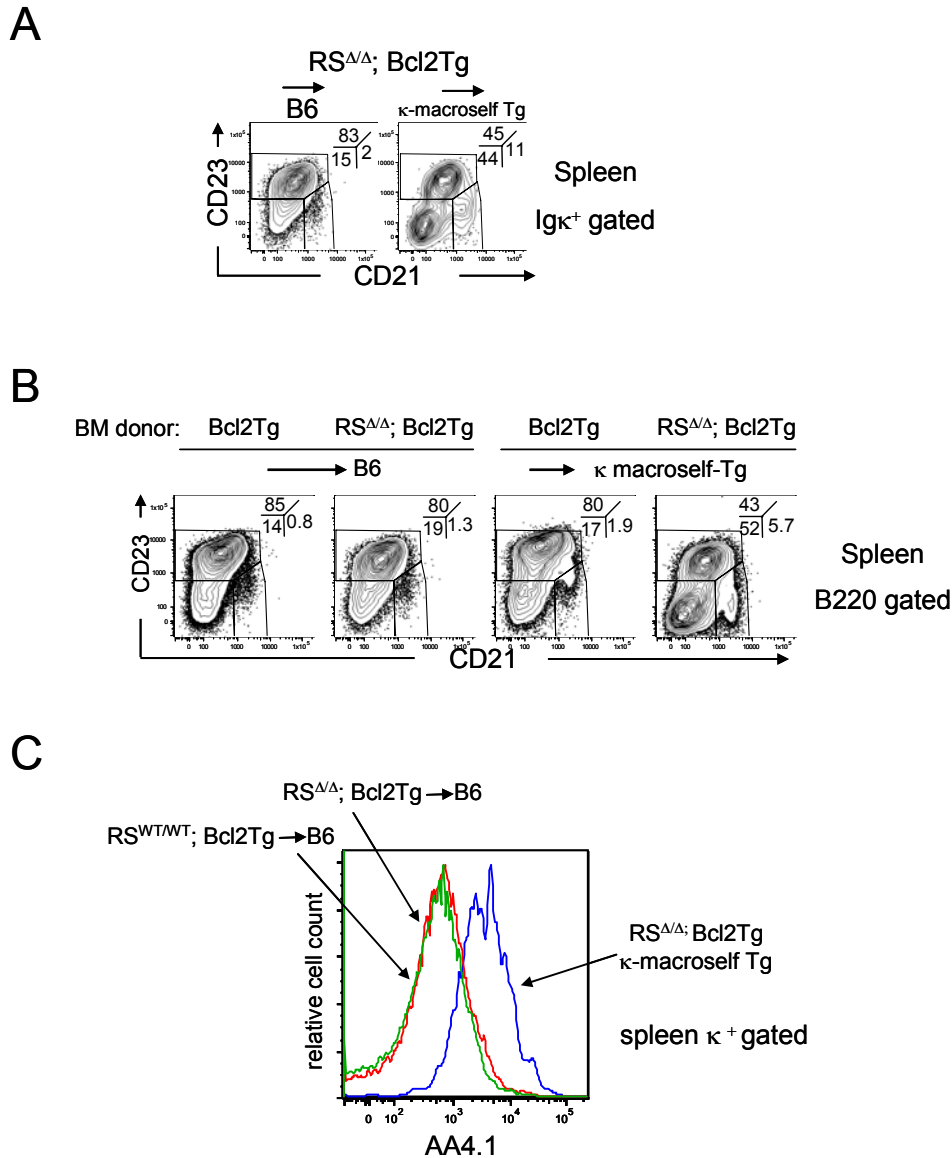

**Figure S3. Analysis of the Effect of RS Mutation on B Cell Tolerance and Cell Surface Phenotype in Apoptosis-Resistant *Bcl2* Tg B Cells**

BM chimeras were generated using donor BM from RS-sufficient or RS-mutant mice that also carried a *Bcl2* transgene enforcing B lineage restricted expression. Irradiated recipient mice were either C57BL6/J.CD45.1 (B6) or littermates that carried a ubiquitously expressed *κ-macroselF* transgene (Ait-Azzouzene et al., 2005) to promote negative selection of κ<sup>+</sup> cells. Radiation chimeras were analyzed at 10 weeks post reconstitution.

(A) CD21,CD23 cell surface phenotype of Igκ<sup>+</sup> gated splenic cells in either RS<sup>ΔΔ</sup>; *Bcl2* Tg→B6 or RS<sup>ΔΔ</sup>; *Bcl2* Tg→*κ-macroselF* Tg chimeras.

(B) Analysis of CD21,CD23 phenotype of B220 gated splenic cells from the indicated chimeras.

(C) Cell surface expression of AA4.1 marker (CD93) on Igκ<sup>+</sup> gated B cells of the indicated chimeric mice. Note: RS<sup>WT/WT</sup>; *Bcl2* Tg→*κ-macroselF* Tg group was excluded because of a lack of κ<sup>+</sup> cells in the spleens of these mice.

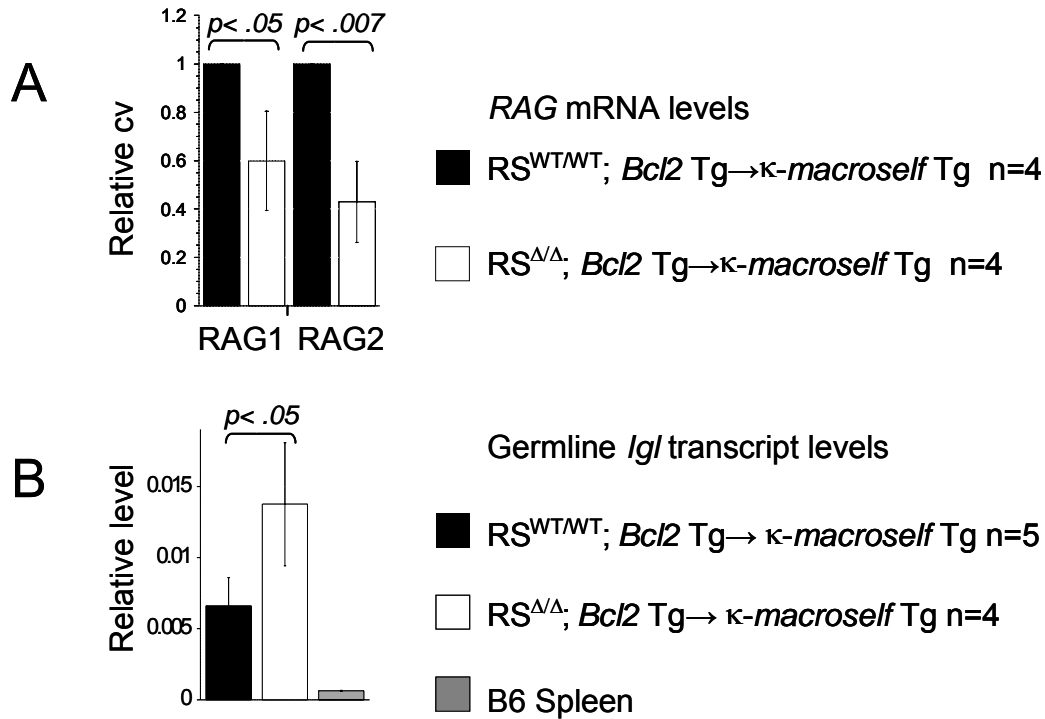

**Figure S4. RNA Analysis of RAG Expression and *Igl* Locus Accessibility in  $RS^{\Delta/\Delta}; Bcl2 Tg \rightarrow \kappa\text{-macroself Tg}$  Chimeras**

RNA was isolated from bone marrow B lineage cells (B220+IgD-) and specific messages quantitated.

(A) RAG mRNA levels measured using real time PCR. Four independent experiments were each normalized to control  $\beta$ -actin levels and combined results depicted in bar graphs. Wild type RAG levels were arbitrarily set to 1 for this comparison and statistical analysis used paired T test. (B) Expression of the  $\lambda_1$  J-C germline transcript. cDNAs were analyzed by semi-quantitative RT-PCR normalized to control  $\beta$ -actin. Graph depicts mean  $\pm$  SD and p value determined using 2-tailed Student's T-test. Spleen cell cDNA served as negative control.

**Table S1. Absolute Numbers of B Cell Subsets in RS<sup>Δ/Δ</sup> and RS<sup>WT/WT</sup> Mouse Tissues (Millions)**

| Genotype                 | tissue | total cells | B220+       | λ <sub>1-3</sub> + | κ+           | κ+λ <sub>1-3</sub> + |
|--------------------------|--------|-------------|-------------|--------------------|--------------|----------------------|
| RS <sup>WT/WT</sup> n=18 | bone   | 37.8 ± 7.17 | 7.23 ± 1.44 | <b>0.31 ± 0.08</b> | 3.07 ± 1.37  | 0.026 ± 0.007        |
| RS <sup>Δ/Δ</sup> n=18   | marrow | 33.1 ± 6.76 | 5.84 ± 1.34 | <b>0.17 ± 0.06</b> | 2.33 ± 0.47  | 0.023 ± 0.010        |
|                          |        |             |             | p= 0.000015        |              |                      |
| RS <sup>WT/WT</sup> n=18 | spleen | 51.4 ± 12.3 | 23.1 ± 7.02 | <b>1.38 ± 0.42</b> | 20.50 ± 6.37 | 0.152 ± 0.095        |
| RS <sup>Δ/Δ</sup> n=18   | spleen | 49.1 ± 16.4 | 20.6 ± 9.40 | <b>0.83 ± 0.33</b> | 18.51 ± 8.66 | 0.095 ± 0.069        |
|                          |        |             |             | p= 0.000097        |              |                      |

Mice were 10-12 weeks of age at time of analysis. Shown are mean values ±SD. p values based on an unpaired 2-tailed Student's T test show significance of difference between RS<sup>WT/WT</sup> and RS<sup>Δ/Δ</sup> mice in λ B cell frequency in the above-indicated tissues.

**Table S2. Numbers of B Cell Subsets in RS<sup>Δ/Δ</sup>; κ-macroself Tg and RS<sup>WT/WT</sup>; κ-macroself Tg Mice (Millions)**

| Genotype                                 | tissue | total cells | B220+       | λ <sub>1-3</sub> + | κ+           | κ+/λ <sub>1-3</sub> + |
|------------------------------------------|--------|-------------|-------------|--------------------|--------------|-----------------------|
| RS <sup>WT/WT</sup> ; κ-macroself Tg n=5 | BM     | 46.6 ± 5.18 | 7.39 ± 1.52 | <b>6.21 ± 3.10</b> | 0.904 ± 0.27 | 0.029 ± 0.009         |
| RS <sup>Δ/Δ</sup> ; κ-macroself Tg n=5   |        | 50.4 ± 7.16 | 8.53 ± 1.28 | <b>1.92 ± 0.88</b> | 1.14 ± 0.30  | 0.057 ± 0.015         |
|                                          |        |             |             | p= 0.018           |              | p= .007               |
| RS <sup>WT/WT</sup> ; κ-macroself Tg n=5 | spleen | 44.4 ± 15.1 | 12.4 ± 4.56 | 11.1 ± 3.92        | 0.05 ± 0.02  | 0.159 ± 0.085         |
| RS <sup>Δ/Δ</sup> ; κ-macroself Tg n=5   |        | 36.6 ± 11.4 | 9.01 ± 2.28 | 6.94 ± 2.60        | 0.09 ± 0.05  | 0.227 ± 0.053         |
|                                          |        |             |             | p= 0.08            |              |                       |

Mice analyzed were 10 weeks old. Shown are mean values ±SD.

## Immunity, Volume 28

**Table S3. Numbers of B Cell Subsets in RS<sup>Δ/Δ</sup>; *Bcl2* Tg→*κ*-*macroself* Tg and RS<sup>WT/WT</sup>; *Bcl2* Tg→*κ*-*macroself* Tg Chimeras (Millions)**

| Genotype (n)                                                             | tissue | total cells       | B220+              | λ+                | κ+                 | κ+λ+                |
|--------------------------------------------------------------------------|--------|-------------------|--------------------|-------------------|--------------------|---------------------|
| RS <sup>WT/WT</sup> ; <i>Bcl2</i> Tg→ <i>κ</i> - <i>macroself</i> Tg n=5 | BM     | 113.6 ± 35.1      | 15.46 ± 6.6        | 2.74 ± 1.3        | <b>0.71 ± 0.79</b> | <b>0.043 ± .018</b> |
| RS <sup>Δ/Δ</sup> ; <i>Bcl2</i> Tg→ <i>κ</i> - <i>macroself</i> Tg n=7   |        | 93.71 ± 12.83     | 16.23 ± 1.8        | 1.67 ± 0.3        | <b>5.48 ± 0.49</b> | <b>0.179 ± .032</b> |
|                                                                          |        |                   |                    | p=.06             | p<10 <sup>-6</sup> | p<10 <sup>-5</sup>  |
| RS <sup>WT/WT</sup> ; <i>Bcl2</i> Tg→ <i>κ</i> - <i>macroself</i> Tg n=5 | Spleen | <b>86 ± 16.4</b>  | <b>13.27 ± 2.7</b> | <b>8.64 ± 4.8</b> | <b>0.05 ± 0.07</b> | 0.022 ± 0.023       |
| RS <sup>Δ/Δ</sup> ; <i>Bcl2</i> Tg→ <i>κ</i> - <i>macroself</i> Tg n=7   |        | <b>49.6 ± 5.6</b> | <b>8.19 ± 2.7</b>  | <b>4.31 ± 1.3</b> | <b>0.78 ± 0.48</b> | 0.064 ± 0.068       |
|                                                                          |        | p= .0003          | p= .009            | p= .04            | p= .008            |                     |
| RS <sup>WT/WT</sup> ; <i>Bcl2</i> Tg → B6 n=5                            | BM     | 102.2 ± 14.8      | 18.37 ± 2.2        | 1.90 ± 0.5        | 6.66 ± 1.77        | 0.094 ± .019        |
| RS <sup>Δ/Δ</sup> ; <i>Bcl2</i> Tg → B6 n=6                              |        | 108.3 ± 25.3      | 16.66 ± 5.4        | 1.49 ± 0.4        | 6.47 ± 3.10        | 0.146 ± .088        |
|                                                                          |        |                   |                    |                   |                    |                     |
| RS <sup>WT/WT</sup> ; <i>Bcl2</i> Tg → B6 n=5                            | Spleen | 100.8 ± 14.0      | 40.92 ± 9.3        | 3.94 ± 1.3        | 34.17 ± 7.51       | 0.236 ± .049        |
| RS <sup>Δ/Δ</sup> ; <i>Bcl2</i> Tg → B6 n=6                              |        | 96.1 ± 20.2       | 37.1 ± 9.7         | 3.61 ± 2.1        | 31.2 ± 7.49        | 0.304 ± .169        |

Chimeras were analyzed 10 weeks after bone marrow transplantation. Shown are mean values ±SD.

### Supplemental References

Ait-Azzouzene,D., Verkoczy,L., Peters,J., Gavin,A., Skog,P., Vela,J.L., and Nemazee,D. (2005). An immunoglobulin C {kappa}-reactive single chain antibody fusion protein induces tolerance through receptor editing in a normal polyclonal immune system. *J.Exp.Med.* 201, 817-828.
